# Supplementary material
Source: MDPI journal article supplement (https://www.mdpi.com/2073-4344/10/4/387)
Supplement: s1 [file s1]

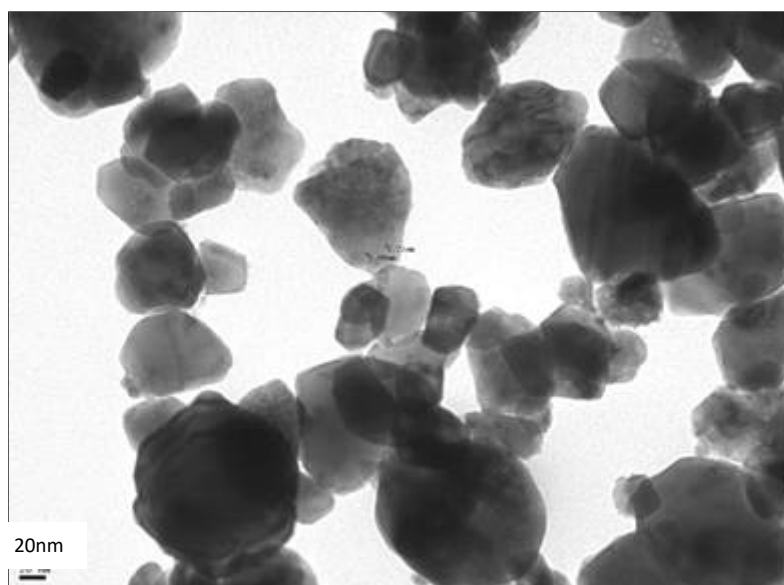

**Figure S1.** TEM micrograph of AuZ catalyst

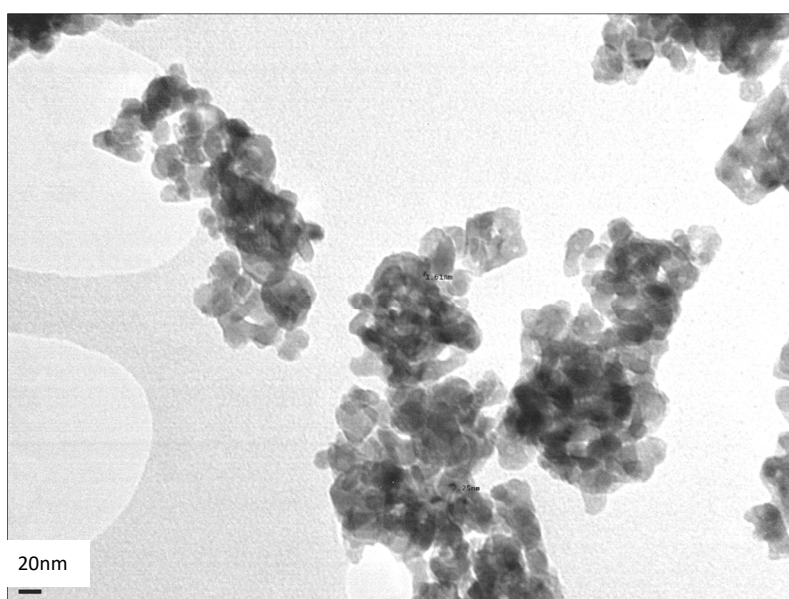

**Figure S2.** TEM micrograph of AuZt catalyst

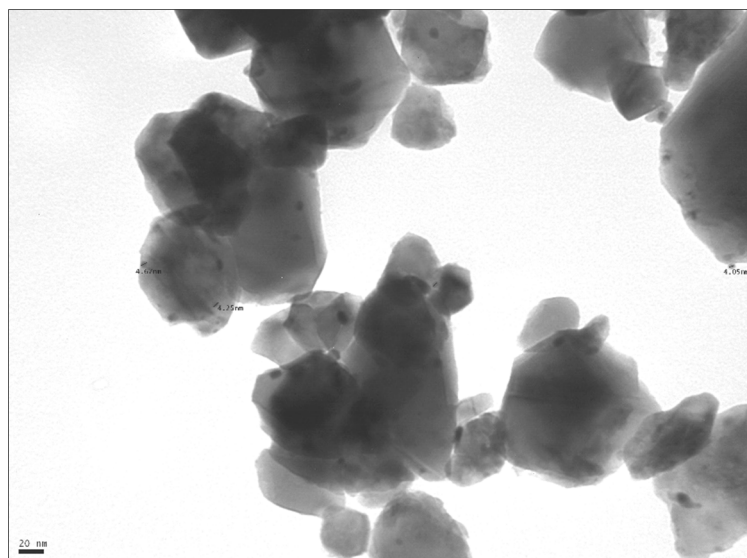

**Figure S3.** TEM micrograph of AuDPZ catalyst

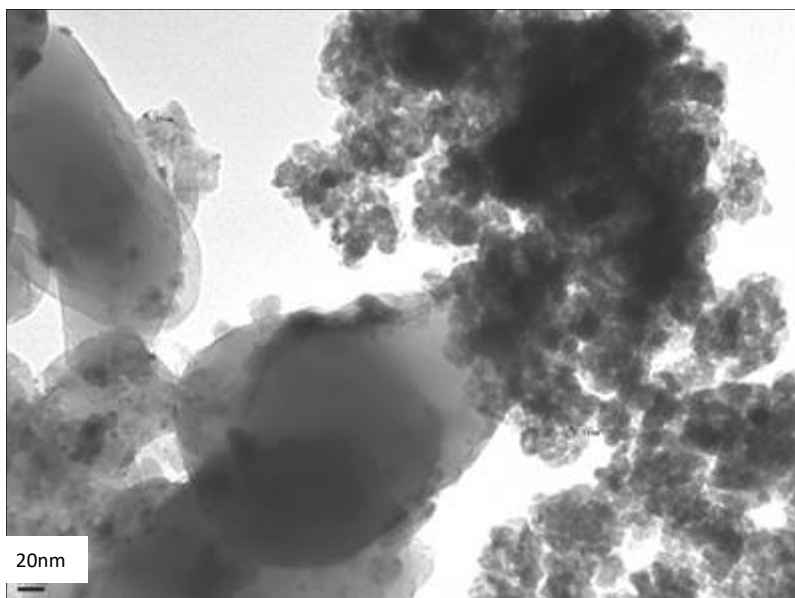

**Figure S4.** TEM micrograph of AuDPZt catalyst

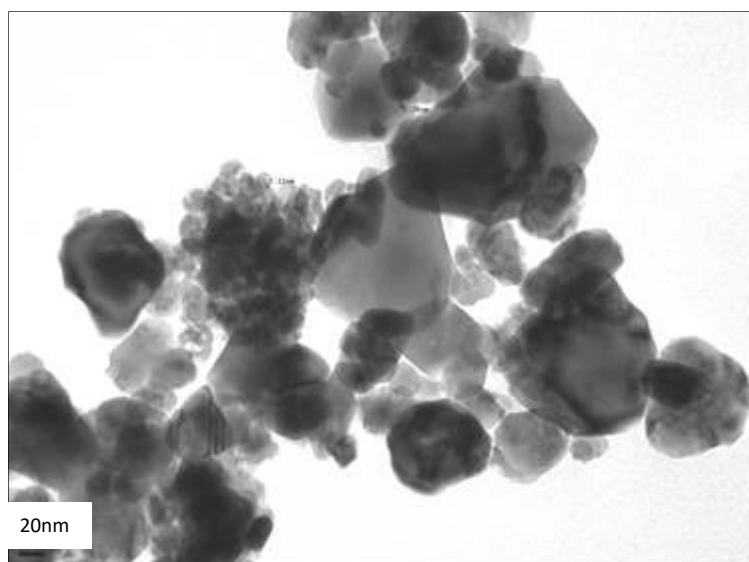

**Figure S5.** TEM micrograph of AuCoZ catalyst

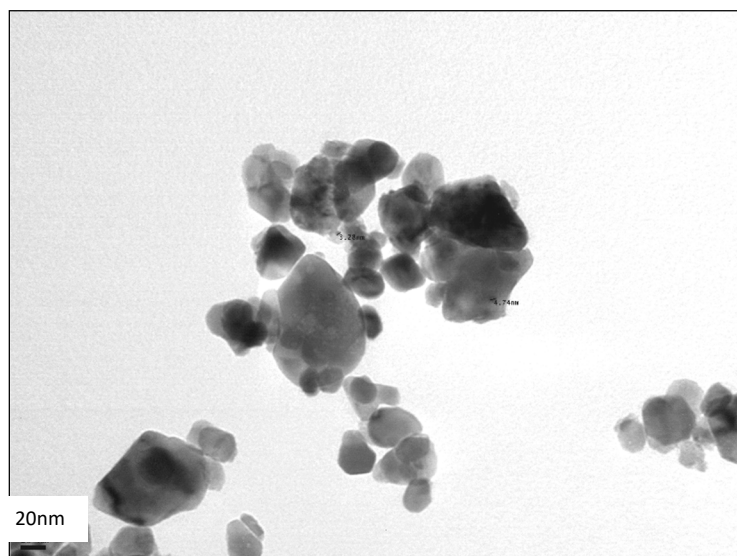

**FigureS6.** TEM micrograph of AuDPCoZ catalyst

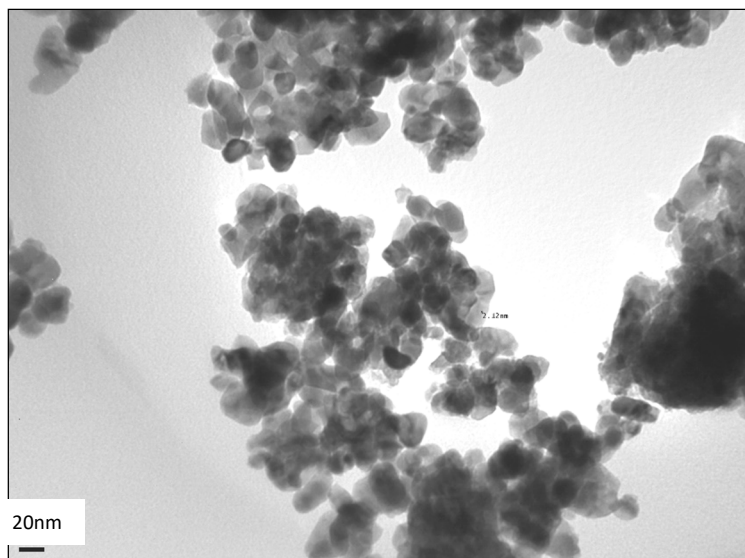

**Figure S7.** TEM micrograph of AuCoZt catalyst

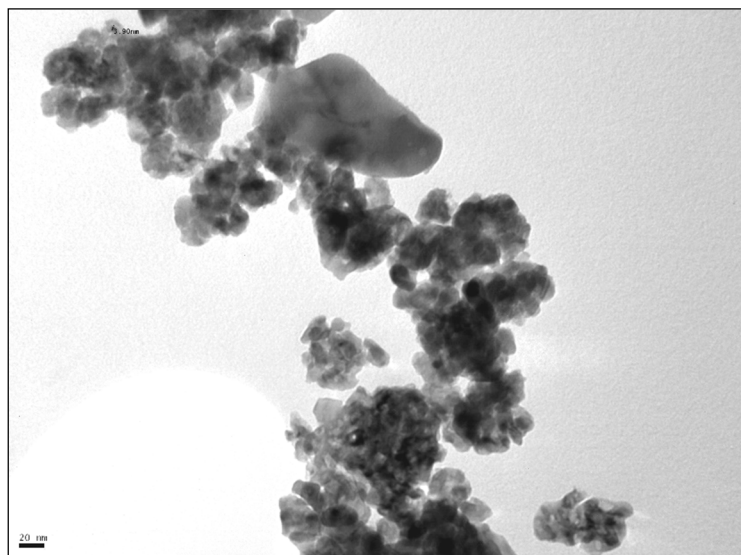

**Figure S8.** TEM micrograph of AuDPCoZt catalyst

**Figure S 9** XPS Au 4f spectra and deconvolution of gold-containing catalysts

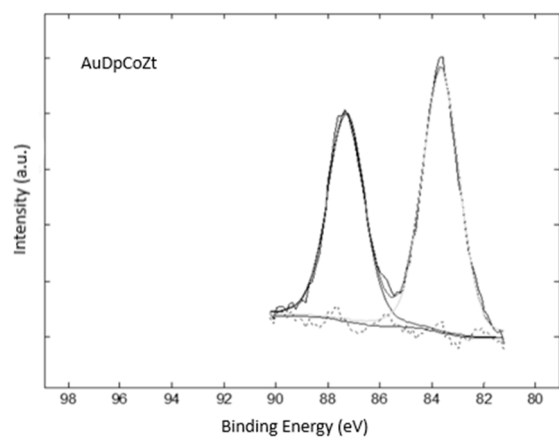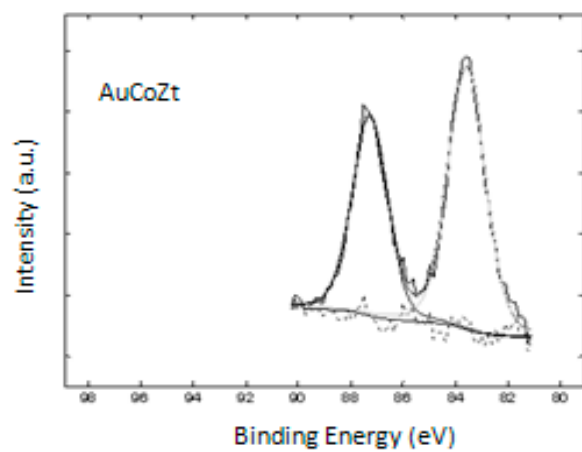

**Table S10.** XPS results. Au/Co and Au/Z atomic ratios of fresh and post-reaction catalysts.

|                      |                    | <b>AuCoZ</b>   |             | <b>AuCoZt</b>   |             |
|----------------------|--------------------|----------------|-------------|-----------------|-------------|
|                      |                    | <b>Au/Co</b>   | <b>Au/Z</b> | <b>Au/Co</b>    | <b>Au/Z</b> |
|                      | <b>Fresh</b>       | 0.0175         | 0.0247      | 0.0173          | 0.0225      |
| <b>Post-reaction</b> | <b>Naphthalene</b> | 0.0156         | 0.0219      | 0.0298          | 0.0237      |
|                      | <b>Propane</b>     | 0.0234         | 0.0198      | 0.0232          | 0.0563      |
|                      |                    | <b>AuDPCoZ</b> |             | <b>AuDPCoZt</b> |             |
|                      | <b>Fresh</b>       | 0.0205         | 0.0547      | 0.0320          | 0.0613      |
| <b>Post-reaction</b> | <b>Naphthalene</b> | 0.0199         | 0.0496      | 0.0335          | 0.0606      |
|                      | <b>Propane</b>     | 0.0232         | 0.0563      | 0.0349          | 0.0664      |
